# Supplementary material for: A new species of Munida Leach, 1820 (Crustacea: Decapoda: Anomura: Munididae) from seamounts of the Nazca-Desventuradas Marine Park
Source: PeerJ journal article supplement (doi:10.7717/peerj.10531), 2021-01-05
Supplement: peerj-52093-Table_S1._Munida_dirita.pdf [file peerj-52093-Table_S1._Munida_dirita.pdf]

1 **Supplementary Material**

2 Table S1. 16S rRNA sequences used for the phylogenetic analysis. Species, Genbank accession numbers,  
 3 length, biogeographical realms (see Spalding 2007), Locality (origin of each specimen) and references.

| Species                 | Genebank accession number | Length (pb) | Biogeographic realms | Locality        | Reference                   |
|-------------------------|---------------------------|-------------|----------------------|-----------------|-----------------------------|
| <i>Munida acantha</i>   | AY351095                  | 513         | Central Indo-Pacific | New Caledonia   | Machordon & Macpherson 2004 |
| <i>Munida acantha</i>   | AY351096                  | 513         | Central Indo-Pacific | New Caledonia   | Machordon & Macpherson 2004 |
| <i>Munida acantha</i>   | AY351097                  | 513         | Central Indo-Pacific | New Caledonia   | Machordon & Macpherson 2004 |
| <i>Munida alonsoi</i>   | AY351098                  | 513         | Central Indo-Pacific | New Caledonia   | Machordon & Macpherson 2004 |
| <i>Munida alonsoi</i>   | AY351102                  | 513         | Central Indo-Pacific | New Caledonia   | Machordon & Macpherson 2004 |
| <i>Munida alonsoi</i>   | AY351104                  | 513         | Central Indo-Pacific | New Caledonia   | Machordon & Macpherson 2004 |
| <i>Munida armilla</i>   | AY351106                  | 513         | Central Indo-Pacific | New Caledonia   | Machordon & Macpherson 2004 |
| <i>Munida armilla</i>   | AY351107                  | 514         | Central Indo-Pacific | New Caledonia   | Machordon & Macpherson 2004 |
| <i>Munida asprosoma</i> | JF727277                  | 446         | Central Indo-Pacific | Taiwan          | Cabezas et al. 2011         |
| <i>Munida asprosoma</i> | JF727279                  | 446         | Central Indo-Pacific | Taiwan          | Cabezas et al. 2011         |
| <i>Munida asprosoma</i> | JF727280                  | 446         | Central Indo-Pacific | Taiwan          | Cabezas et al. 2011         |
| <i>Munida caeli</i>     | EU417975                  | 430         | Central Indo-Pacific | Solomon Islands | Cabezas et al. 2009         |
| <i>Munida caeli</i>     | EU417977                  | 430         | Central Indo-Pacific | Solomon Islands | Cabezas et al. 2009         |
| <i>Munida clinata</i>   | AY351111                  | 516         | Central Indo-Pacific | New Caledonia   | Machordon & Macpherson 2004 |
| <i>Munida clinata</i>   | AY351112                  | 516         | Central Indo-Pacific | New Caledonia   | Machordon & Macpherson 2004 |
| <i>Munida clinata</i>   | AY351113                  | 516         | Central Indo-Pacific | New Caledonia   | Machordon & Macpherson 2004 |
| <i>Munida compressa</i> | AY351114                  | 513         | Central Indo-Pacific | Salomon Is.     | Machordon & Macpherson 2004 |
| <i>Munida congesta</i>  | AY351115                  | 512         | Central Indo-Pacific | New Caledonia   | Machordon & Macpherson 2004 |
| <i>Munida delicata</i>  | EU417976                  | 434         | Central Indo-Pacific | New Caledonia   | Cabezas et al. 2009         |
| <i>Munida devestiva</i> | EU417989                  | 427         | Central Indo-Pacific | New Caledonia   | Cabezas et al. 2009         |
| <i>Munida distiza</i>   | AY351116                  | 512         | Central Indo-Pacific | New Caledonia   | Machordon & Macpherson 2004 |
| <i>Munida distiza</i>   | AY351118                  | 512         | Central Indo-Pacific | New Caledonia   | Machordon & Macpherson 2004 |
| <i>Munida distiza</i>   | AY351119                  | 512         | Central Indo-Pacific | New Caledonia   | Machordon & Macpherson 2004 |
| <i>Munida eclepsis</i>  | AY351120                  | 512         | Central Indo-Pacific | New Caledonia   | Machordon & Macpherson 2004 |
| <i>Munida eclepsis</i>  | AY351121                  | 512         | Central Indo-Pacific | New Caledonia   | Machordon & Macpherson 2004 |
| <i>Munida eclepsis</i>  | AY351122                  | 512         | Central Indo-Pacific | New Caledonia   | Machordon & Macpherson 2004 |
| <i>Munida gordoae</i>   | AY351124                  | 515         | Central Indo-Pacific | New Caledonia   | Machordon & Macpherson 2004 |
| <i>Munida gordoae</i>   | AY351126                  | 515         | Central Indo-Pacific | New Caledonia   | Machordon & Macpherson 2004 |

|                             |          |     |                      |                  |                             |
|-----------------------------|----------|-----|----------------------|------------------|-----------------------------|
| <i>Munida gordoae</i>       | AY351127 | 515 | Central Indo-Pacific | New Caledonia    | Machordon & Macpherson 2004 |
| <i>Munida guttata</i>       | AY351128 | 512 | Central Indo-Pacific | New Caledonia    | Machordon & Macpherson 2004 |
| <i>Munida guttata</i>       | AY351130 | 512 | Central Indo-Pacific | New Caledonia    | Machordon & Macpherson 2004 |
| <i>Munida guttata</i>       | AY351131 | 512 | Central Indo-Pacific | New Caledonia    | Machordon & Macpherson 2004 |
| <i>Munida idyia</i>         | MK458565 | 512 | Central Indo-Pacific | Papua New Guinea | (Macpherson et al. 2020)    |
| <i>Munida idyia</i>         | MK458566 | 512 | Central Indo-Pacific | Papua New Guinea | Macpherson et al 2020       |
| <i>Munida lailai</i>        | EU417988 | 432 | Central Indo-Pacific | Fiji Islands     | Cabezas et al. 2009         |
| <i>Munida lanciaria</i>     | JF727288 | 447 | Central Indo-Pacific | Taiwan           | Cabezas et al. 2011         |
| <i>Munida lanciaria</i>     | JF727289 | 447 | Central Indo-Pacific | Taiwan           | Cabezas et al. 2011         |
| <i>Munida leagora</i>       | AY351132 | 513 | Central Indo-Pacific | New Caledonia    | Machordon & Macpherson 2004 |
| <i>Munida leagora</i>       | AY351133 | 513 | Central Indo-Pacific | New Caledonia    | Machordon & Macpherson 2004 |
| <i>Munida leagora</i>       | AY351135 | 513 | Central Indo-Pacific | New Caledonia    | Machordon & Macpherson 2004 |
| <i>Munida leptosyne</i>     | AY351141 | 511 | Central Indo-Pacific | New Caledonia    | Machordon & Macpherson 2004 |
| <i>Munida leviantennata</i> | AY351142 | 513 | Central Indo-Pacific | New Caledonia    | Machordon & Macpherson 2004 |
| <i>Munida macphersoni</i>   | JF727284 | 447 | Central Indo-Pacific | Taiwan           | Cabezas et al. 2011         |
| <i>Munida mendagnai</i>     | EU417973 | 428 | Central Indo-Pacific | Solomon Islands  | Cabezas et al. 2009         |
| <i>Munida mendagnai</i>     | EU417974 | 428 | Central Indo-Pacific | Solomon Islands  | Cabezas et al. 2009         |
| <i>Munida militaris</i>     | AY351143 | 512 | Central Indo-Pacific | New Caledonia    | Machordon & Macpherson 2004 |
| <i>Munida militaris</i>     | JF727285 | 446 | Central Indo-Pacific | Taiwan           | Cabezas et al. 2011         |
| <i>Munida militaris</i>     | JF727286 | 446 | Central Indo-Pacific | Taiwan           | Cabezas et al. 2011         |
| <i>Munida notata</i>        | AY351144 | 515 | Central Indo-Pacific | New Caledonia    | Machordon & Macpherson 2004 |
| <i>Munida notata</i>        | AY351146 | 515 | Central Indo-Pacific | New Caledonia    | Machordon & Macpherson 2004 |
| <i>Munida notata</i>        | AY351147 | 507 | Central Indo-Pacific | New Caledonia    | Machordon & Macpherson 2004 |
| <i>Munida oblongata</i>     | EU417978 | 434 | Central Indo-Pacific | Solomon Islands  | Cabezas et al. 2009         |
| <i>Munida ommata</i>        | AY351148 | 514 | Central Indo-Pacific | New Caledonia    | Machordon & Macpherson 2004 |
| <i>Munida ommata</i>        | AY351150 | 514 | Central Indo-Pacific | New Caledonia    | Machordon & Macpherson 2004 |
| <i>Munida ommata</i>        | AY351151 | 514 | Central Indo-Pacific | New Caledonia    | Machordon & Macpherson 2004 |
| <i>Munida pagesi</i>        | AY351152 | 437 | Central Indo-Pacific | New Caledonia    | Machordon & Macpherson 2004 |
| <i>Munida parca</i>         | EU417986 | 429 | Central Indo-Pacific | New Caledonia    | Cabezas et al. 2009         |
| <i>Munida parca</i>         | EU417987 | 431 | Central Indo-Pacific | New Caledonia    | Cabezas et al. 2009         |
| <i>Munida proto</i>         | AY351153 | 444 | Central Indo-Pacific | Fiji Is          | Machordon & Macpherson 2004 |
| <i>Munida psamathe</i>      | AY351154 | 511 | Central Indo-Pacific | New Caledonia    | Machordon & Macpherson 2004 |
| <i>Munida psamathe</i>      | AY351155 | 511 | Central Indo-Pacific | New Caledonia    | Machordon & Macpherson 2004 |

|                                       |                 |     |                         |                    |                             |
|---------------------------------------|-----------------|-----|-------------------------|--------------------|-----------------------------|
| <i>Munida psamathe</i>                | AY351158        | 511 | Central Indo-Pacific    | New Caledonia      | Machordon & Macpherson 2004 |
| <i>Munida psylla</i>                  | AY351159        | 511 | Central Indo-Pacific    | New Caledonia      | Machordon & Macpherson 2004 |
| <i>Munida rhodonia</i>                | AY351160        | 512 | Central Indo-Pacific    | New Caledonia      | Machordon & Macpherson 2004 |
| <i>Munida rhodonia</i>                | AY351161        | 512 | Central Indo-Pacific    | New Caledonia      | Machordon & Macpherson 2004 |
| <i>Munida rosula</i>                  | AY351162        | 512 | Central Indo-Pacific    | New Caledonia      | Machordon & Macpherson 2004 |
| <i>Munida rubrodigitalis</i>          | AY351163        | 513 | Central Indo-Pacific    | New Caledonia      | Machordon & Macpherson 2004 |
| <i>Munida rufiantennulata</i>         | AY351164        | 512 | Central Indo-Pacific    | New Caledonia      | Machordon & Macpherson 2004 |
| <i>Munida spilota</i>                 | AY351165        | 512 | Central Indo-Pacific    | New Caledonia      | Machordon & Macpherson 2004 |
| <i>Munida spilota</i>                 | AY351166        | 512 | Central Indo-Pacific    | New Caledonia      | Machordon & Macpherson 2004 |
| <i>Munida stia</i>                    | AY351168        | 517 | Central Indo-Pacific    | New Caledonia      | Machordon & Macpherson 2004 |
| <i>Munida stia</i>                    | AY351169        | 517 | Central Indo-Pacific    | New Caledonia      | Machordon & Macpherson 2004 |
| <i>Munida stia</i>                    | AY351170        | 517 | Central Indo-Pacific    | New Caledonia      | Machordon & Macpherson 2004 |
| <i>Munida taenia</i>                  | AY351173        | 512 | Central Indo-Pacific    | New Caledonia      | Machordon & Macpherson 2004 |
| <i>Munida taenia</i>                  | AY351175        | 512 | Central Indo-Pacific    | New Caledonia      | Machordon & Macpherson 2004 |
| <i>Munida taenia</i>                  | AY351176        | 512 | Central Indo-Pacific    | New Caledonia      | Machordon & Macpherson 2004 |
| <i>Munida thoe</i>                    | AY351178        | 512 | Central Indo-Pacific    | New Caledonia      | Machordon & Macpherson 2004 |
| <i>Munida thoe</i>                    | AY351179        | 512 | Central Indo-Pacific    | New Caledonia      | Machordon & Macpherson 2004 |
| <i>Munida thoe</i>                    | AY351180        | 512 | Central Indo-Pacific    | New Caledonia      | Machordon & Macpherson 2004 |
| <i>Munida tiresias</i>                | AY351183        | 513 | Central Indo-Pacific    | New Caledonia      | Machordon & Macpherson 2004 |
| <i>Munida tuberculata</i>             | AY351184        | 514 | Central Indo-Pacific    | New Caledonia      | Machordon & Macpherson 2004 |
| <i>Munida tyche</i>                   | AY351185        | 513 | Central Indo-Pacific    | Vanuatu            | Machordon & Macpherson 2004 |
| <i>Munida tyche</i>                   | AY351186        | 512 | Central Indo-Pacific    | New Caledonia      | Machordon & Macpherson 2004 |
| <i>Munida zebra</i>                   | AY351187        | 511 | Central Indo-Pacific    | New Caledonia      | Machordon & Macpherson 2004 |
| <i>Munida zebra</i>                   | AY351189        | 511 | Central Indo-Pacific    | New Caledonia      | Machordon & Macpherson 2004 |
| <i>Munida zebra</i>                   | AY351190        | 511 | Central Indo-Pacific    | New Caledonia      | Machordon & Macpherson 2004 |
| <b><i>Munida diritas sp. nov.</i></b> | <b>MT936349</b> | 512 | Temperate South America | Desventuras Island | Present study               |
| <i>Munida gregaria</i>                | AY700158        | 416 | Temperate South America | Chile              | Pérez-Barros et al. 2008    |
| <i>Munida gregaria</i>                | EF428963        | 512 | Temperate South America | Argentina          | Terrat et al. 2008          |
| <i>Munida spinosa</i>                 | KJ957175        | 468 | Temperate South America | Argentina          | GenBank                     |
| <i>Munida spinosa</i>                 | KJ957182        | 462 | Temperate South America | Argentina          | GenBank                     |
| <i>Munida subrugosa</i>               | AY050075        | 407 | Temperate South America | Chile              | Pérez-losada et al. 2002    |
| <i>Munida subrugosa</i>               | AY700159        | 416 | Temperate South America | Chile              | Pérez-Barros et al. 2008    |
| <i>Munida subrugosa</i>               | AY700161        | 416 | Temperate South America | Chile              | Pérez-Barros et al. 2008    |

|                                  |          |     |                         |                 |                             |
|----------------------------------|----------|-----|-------------------------|-----------------|-----------------------------|
| <i>Munida flinti</i>             | MF490158 | 517 | Tropical Atlantic       | Brasil          | Mantelatto et al. 2017      |
| <i>Munida iris</i>               | KF182521 | 448 | Tropical Atlantic       | Musean specimen | Bracken-Grissom et al. 2013 |
| <i>Munida microphthalmalma</i>   | MF490159 | 512 | Tropical Atlantic       | Brasil          | Mantelatto et al. 2017      |
| <i>Munida pusilla</i>            | KF182522 | 517 | Tropical Atlantic       | Musean specimen | Bracken-Grissom et al. 2013 |
| <i>Munida valida</i>             | JN800548 | 480 | Tropical Atlantic       | Musean specimen | Bybee et al. 2011           |
| <i>Munida benguela</i>           | KY230467 | 497 | Western Indo-Pacific    | Mozambique      | Macpherson et al. 2017      |
| <i>Munida benguela</i>           | KY230468 | 501 | Western Indo-Pacific    | Mozambique      | Macpherson et al. 2017      |
| <i>Munida euripa</i>             | KY230469 | 513 | Western Indo-Pacific    | Madagascar      | Macpherson et al. 2017      |
| <i>Munida mesembria</i>          | KY230470 | 513 | Western Indo-Pacific    | Mozambique      | Macpherson et al. 2017      |
| <i>Munida mesembria</i>          | KY230471 | 481 | Western Indo-Pacific    | Mozambique      | Macpherson et al. 2017      |
| <i>Munida remota</i>             | KY230472 | 512 | Western Indo-Pacific    | Madagascar      | Macpherson et al. 2017      |
| <i>Munida shaula</i>             | KY230473 | 512 | Western Indo-Pacific    | Madagascar      | Macpherson et al. 2017      |
| <i>Munida shaula</i>             | KY230474 | 512 | Western Indo-Pacific    | Madagascar      | Macpherson et al. 2017      |
| <i>Munida stomifera</i>          | KY230475 | 477 | Western Indo-Pacific    | Madagascar      | Macpherson et al. 2017      |
| <i>Cervimunida johni</i>         | AY351244 | 513 | Temperate South America | Chile           | Machordon & Macpherson 2004 |
| <i>Pleuroncodes monodon</i>      | AY351259 | 514 | Temperate South America | Chile           | Machordon & Macpherson 2004 |
| <i>Raymunida insulata</i>        | AY351235 | 513 | Western Indo-Pacific    | Seychelles Is   | Machordon & Macpherson 2004 |
| <i>Raymunida elegantissima</i>   | AY351231 | 512 | Central Indo-Pacific    | New Caledonia   | Machordon & Macpherson 2004 |
| <i>Raymunida cagnetei</i>        | AY351224 | 511 | Eastern Indo-Pacific    | Marquesas Is.   | Machordon & Macpherson 2004 |
| <i>Eumunida sternomaculata</i>   | AY351260 | 515 | Central Indo-Pacific    | New Caledonia   | Machordon & Macpherson 2004 |
| <i>Leiogalathea laevirostris</i> | AY351252 | 506 | Central Indo-Pacific    | New Caledonia   | Machordon & Macpherson 2004 |

4

## 5 References:

6

- 7 Bracken-Grissom, H. D., M. E. Cannon, P. Cabezas, R. M. Feldmann, C. E. Schweitzer, S. T.  
8 Ahyong, D. L. Felder, R. Lemaitre, and K. A. Crandall. 2013. A comprehensive and  
9 integrative reconstruction of evolutionary history for Anomura (Crustacea: Decapoda).  
10 BMC Evolutionary Biology 13:128.
- 11 Bybee, S. M., H. Bracken-Grissom, B. D. Haynes, R. A. Hermansen, R. L. Byers, M. J.  
12 Clement, J. A. Udall, E. R. Wilcox, and K. A. Crandall. 2011. Targeted Amplicon  
13 Sequencing (TAS): A Scalable Next-Gen Approach to Multilocus, Multitaxa  
14 Phylogenetics. Genome Biology and Evolution 3:1312–1323.
- 15 Cabezas, P., C. Lin, and T. Chan. 2011. Two new species of the deep-sea squat lobster genus

- 16 *Munida* Leach, 1820 (Crustacea: Decapoda: Munididae) from Taiwan: morphological  
17 and molecular evidence. *Zootaxa* 3036:26–38.
- 18 Cabezas, P., E. Macpherson, and A. Machordom. 2009. Morphological and molecular  
19 description of new species of squat lobster (Crustacea: Decapoda: Galatheidae) from the  
20 Solomon and Fiji Islands (South-West Pacific ). *Zoological Journal of the Linnean*  
21 *Society* 156:465–493.
- 22 Machordom, A., and E. Macpherson. 2004. Rapid radiation and cryptic speciation in squat  
23 lobsters of the genus *Munida* (Crustacea, Decapoda) and related genera in the South  
24 West Pacific: molecular and morphological evidence. *Molecular Biology and Evolution*  
25 33:259–279.
- 26 Macpherson, E., P. C. Rodríguez-Flores, and A. Machordom. 2017. New sibling species and  
27 new occurrences of squat lobsters (Crustacea, Decapoda) from the western Indian  
28 Ocean. *European Journal of Taxonomy* 343:1–61.
- 29 Macpherson, E., P. C. Rodríguez-Flores, and A. Machordom. 2020. Squat lobsters of the  
30 families Munididae and Munidopsidae from Papua New Guinea. Pages 13–120 *in* L.  
31 Corbari, S. T. Ah Yong, and T.-Y. Chan, editors. *Deep-Sea Crustaceans from Papua New*  
32 *Guinea. Tropical Deep-Sea Benthos* 31. Muséum national d’Histoire naturelle, Paris.
- 33 Mantelatto, F. L., M. Terossi, M. Negri, C. Raquel, R. Robles, T. Magalhães, A. F.  
34 Tamburus, N. Rossi, M. J. Miyazaki, F. L. Mantelatto, M. Terossi, M. Negri, C. Raquel,  
35 R. Robles, T. Magalhães, A. F. Tamburus, N. Rossi, F. L. Mantelatto, M. Terossi, M.  
36 Negri, R. C. Buranelli, R. R. ã, T. Magalh, and A. F. Tamburus. 2017. DNA sequence  
37 database as a tool to identify decapod crustaceans on the São Paulo coastline Paulo  
38 coastline. *Mitochondrial DNA Part A* 0:1–11.
- 39 Pérez-Barros, P., M. E. D. Amato, N. V Guzmán, and G. A. Lovrich. 2008. Taxonomic status  
40 of two South American sympatric squat lobsters , *Munida gregaria* and *Munida*  
41 *subrugosa* (Crustacea: Decapoda: Galatheidae , challenged by DNA sequence  
42 information. *Biological Journal of the Linnean Society* 94:421–434.
- 43 Pérez-losada, M., C. G. Jara, G. Bond-Buckup, and K. A. Crandall. 2002. Phylogenetic  
44 relationships among the species of *Aegla* (Anomura: Aeglidae) freshwater crabs from  
45 Chile. *Journal of Crustacean Biology* 22:304–313.
- 46 Terrat, Y., E. Bonnivard, and D. Higuét. 2008. GalEa retrotransposons from galatheid squat

47 lobsters (Decapoda, Anomura) de W ne a new clade of Ty1/copia-like elements  
48 restricted to aquatic species. *Molecular Genetics and Genomics* 279:63–73.  
49
